# Supplementary material for: Hierarchically porous polystyrene membranes fabricated via a CO2-expanded liquid selective swelling and in situ hyper-cross-linking method
Source: Royal Society of Chemistry journal article supplement (doi:10.1039/c5ra12438g), 2015-01-01
Supplement: c5ra12438g1.pdf [file c5ra12438g1.pdf]

**Supplementary information for Hierarchically porous polystyrene  
membranes fabricated *via* CO<sub>2</sub>-expanded liquid selectively swelling and *in  
situ* hyper-cross-linking method**

Haozong Wang,<sup>a</sup> Hua Bai,<sup>a</sup> and Lei Li<sup>\*ab</sup>

<sup>a</sup> College of Materials, Xiamen University, Xiamen 361005, People's Republic of China. E-mail: lilei@xmu.edu.cn; Tel: +86-592-2186296; Fax: +86-592-2183937.

<sup>b</sup> State Key Laboratory for Modification of Chemical Fibers and Polymer Materials, Donghua University, Shanghai 201620, People's Republic of China.

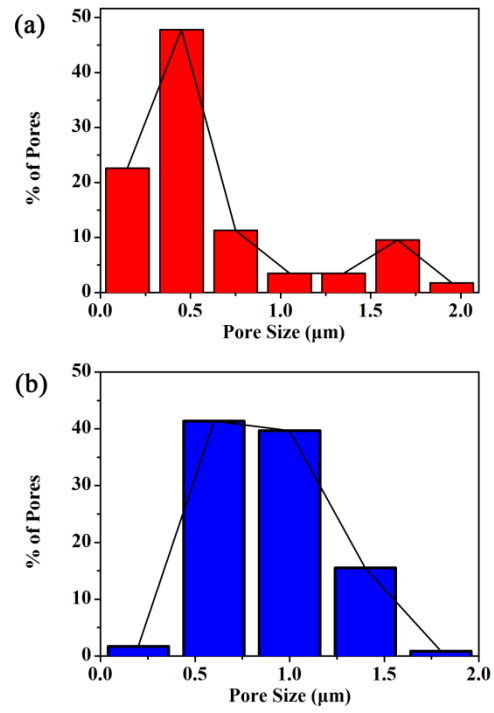

Fig S1 The histogram of pore sizes distribution after (a) CXL and (b) hyper-cross-linking processes calculated according to the SEM images.

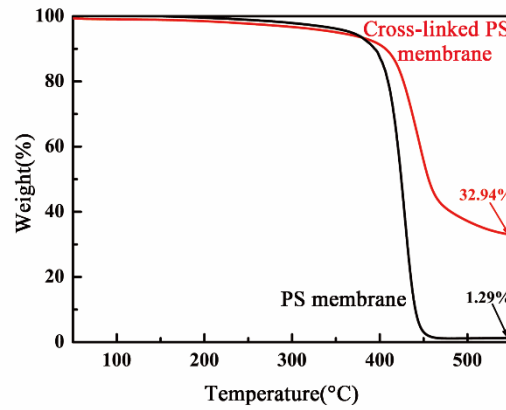

Fig S2 TGA curves of uncross-linked the PS membrane (black) and the hyper-cross-linked PS membrane (red).
